# Supplementary material for: Meeting Highlights: The First Korean Breast Cancer Treatment Consensus Conference
Source: PubMed Central journal article supplement — J Breast Cancer. 2014 Dec 26;17(4):308–13. doi: 10.4048/jbc.2014.17.4.308 (PMC4278048; doi:10.4048/jbc.2014.17.4.308), 2014-12-26
Supplement: jbc-17-308-s001.pdf [file jbc-17-308-s001.pdf]

**Supplementary Table 1.** Professional composition of the panels at first Korean Breast Cancer Treatment Consensus Conference

| List of Panelist (listed by alphabetical order)                                                                                                            |                                                                                                                                                                           |
|------------------------------------------------------------------------------------------------------------------------------------------------------------|---------------------------------------------------------------------------------------------------------------------------------------------------------------------------|
| 1. Jin-Hee Ahn, MD, PhD<br>Department of Oncology, Asan Medical Center, University of Ulsan College of Medicine                                            | 21. Seung Ja Kim, MD, PhD<br>Department of Radiology, Seoul Metropolitan Government-Seoul National University Boramae Medical Center                                      |
| 2. Jin Seok Ahn, MD<br>Department of Medicine, Samsung Medical Center, Sungkyunkwan University School of Medicine                                          | 22. Su Ssan Kim, MD, PhD<br>Department of Radiation Oncology, Asan Medical Center, University of Ulsan College of Medicine                                                |
| 3. Sei Hyun Ahn, MD, PhD<br>Department of Surgery, Asan Medical center, University of Ulsan College of Medicine                                            | 23. Sung-Bae Kim<br>Department of Oncology, Asan Medical Center, University of Ulsan College of Medicine                                                                  |
| 4. Sun Kyung Baek, MD<br>Department of Hemato-Oncology, Kyung Hee University School of Medicine                                                            | 24. Sung Yong Kim, MD<br>Department of Surgery, Soonchunhyang University Cheonan Hospital, Soonchunhyang University College of Medicine                                   |
| 5. Joo Hee Cha, MD<br>Department of Radiology, Asan Medical Center, University of Ulsan College of Medicine                                                | 25. Yong Bae Kim, MD<br>Department of Radiation Oncology, Yonsei Cancer Center, Yonsei University College of Medicine                                                     |
| 6. Yeesoo Chae, MD<br>Department of Medical Oncology, Kyungpook National University Medical Center                                                         | 26. Tae Hyun Kim, MD, PhD<br>Department of Surgery, Busan Paik Hospital, Inje University College of Medicine                                                              |
| 7. Eun Yoon Cho, MD<br>Department of Pathology, Samsung Medical Center, Sungkyunkwan University School of Medicine                                         | 27. Eun Sook Lee, MD<br>Center for Breast Cancer, Research Institute and Hospital, National Cancer Center                                                                 |
| 8. Young Up Cho, MD<br>Department of Surgery, Inha University School of Medicine                                                                           | 28. Keun Seok Lee, MD, PhD<br>Center for Breast Cancer, National Cancer Center                                                                                            |
| 9. Gyungyub Gong, MD<br>Department of Pathology, Asan Medical Center, University of Ulsan College of Medicine                                              | 29. Kyoung Eun Lee<br>Department of Hematology-Oncology, Ewha Womans University School of Medicine                                                                        |
| 10. Boo-Kyung Han, MD<br>Department of Radiology, Samsung Medical Center, Sungkyunkwan University School of Medicine                                       | 30. Minhyuk Lee, MD, PhD<br>Department of Surgery, Soonchunhyang University College of Medicine                                                                           |
| 11. Sehwon Han, MD, PhD<br>Department of Surgery, Inje University Sanggye Paik Hospital                                                                    | 31. In Hae Park, MD<br>Center for Breast Cancer, National Cancer Center                                                                                                   |
| 12. Wonshik Han, MD, PhD<br>Department of Surgery and Cancer Research Institute, Seoul National University College of Medicine                             | 32. Sarah Park, MD, PhD<br>Division of Medical Oncology, Department of Internal Medicine, Seoul St. Mary's Hospital, The Catholic University of Korea College of Medicine |
| 13. Seock-Ah Im, MD, PhD<br>Department of Internal Medicine, Cancer Research Institute, Seoul National University College of Medicine                      | 33. Yeon Hee Park, MD, PhD<br>Division of Hematology-Oncology, Department of Medicine, Samsung Medical Center, Sungkyunkwan University School of Medicine                 |
| 14. Young-Hyuck Im, MD, PhD<br>Division of Hematology/Oncology, Department of Medicine, Samsung Medical Center, Sungkyunkwan University School of Medicine | 34. Jae Hong Seo, MD<br>Department of Medical Oncology, Korea University College of Medicine                                                                              |
| 15. Seok Yun Kang, MD<br>Department of Hematology-Oncology, Ajou University School of Medicine                                                             | 35. Kyung Hwan Shin, MD, PhD<br>Center for Breast Cancer and Proton Therapy Center, National Cancer Center                                                                |
| 16. Eun-Kyung Kim, MD, PhD<br>Department of Radiology, Yonsei University College of Medicine                                                               | 36. Joohyuk Sohn, MD, PhD<br>Division of Medical Oncology, Yonsei University College of Medicine                                                                          |
| 17. Jeryong Kim, MD, PhD<br>Department of Surgery, Chungnam National University Hospital                                                                   | 37. Byung Joo Song, MD, PhD<br>Department of Surgery, Seoul St. Mary's Hospital, The Catholic University of Korea College of Medicine                                     |
| 18. Lee Su Kim, MD, PhD<br>Department of Surgery, Hallym University College of Medicine                                                                    | 38. Jung-Hyun Yang, MD<br>Department of Surgery, Konkuk University School of Medicine                                                                                     |
| 19. Min Jung Kim, MD, PhD<br>Department of Radiology, Yonsei University College of Medicine                                                                | 39. Junghan Yoon, MD<br>Department of Surgery, Chonnam National University Hwasun Hospital                                                                                |
| 20. Seung Il Kim, MD, PhD<br>Department of Surgery, Yonsei University College of Medicine                                                                  | 40. Anonymous-01*<br>Representative of radiation oncologist                                                                                                               |

\*Consensus Conference Committee appreciate all the panelists including a panelist who wished to remain anonymous.
